# Supplementary material for: Coupling of magnetic orders in a 4f metal/oxide system
Source: Royal Society of Chemistry journal article supplement (doi:10.1039/c8tc02661k), 2018-01-01
Supplement: c8tc02661k1.pdf [file c8tc02661k1.pdf]

## **Electronic Supplementary Information**

### **Coupling of magnetic orders in a 4*f* metal/oxide system**

Dmitry V. Averyanov, Andrey M. Tokmachev, Oleg E. Parfenov, Igor A. Karateev,  
Alexander N. Taldenkov, Vyacheslav G. Storchak\*

National Research Centre “Kurchatov Institute”, Kurchatov Sq. 1, Moscow 123182, Russia

\* E-mail: [mussr@triumf.ca](mailto:mussr@triumf.ca)

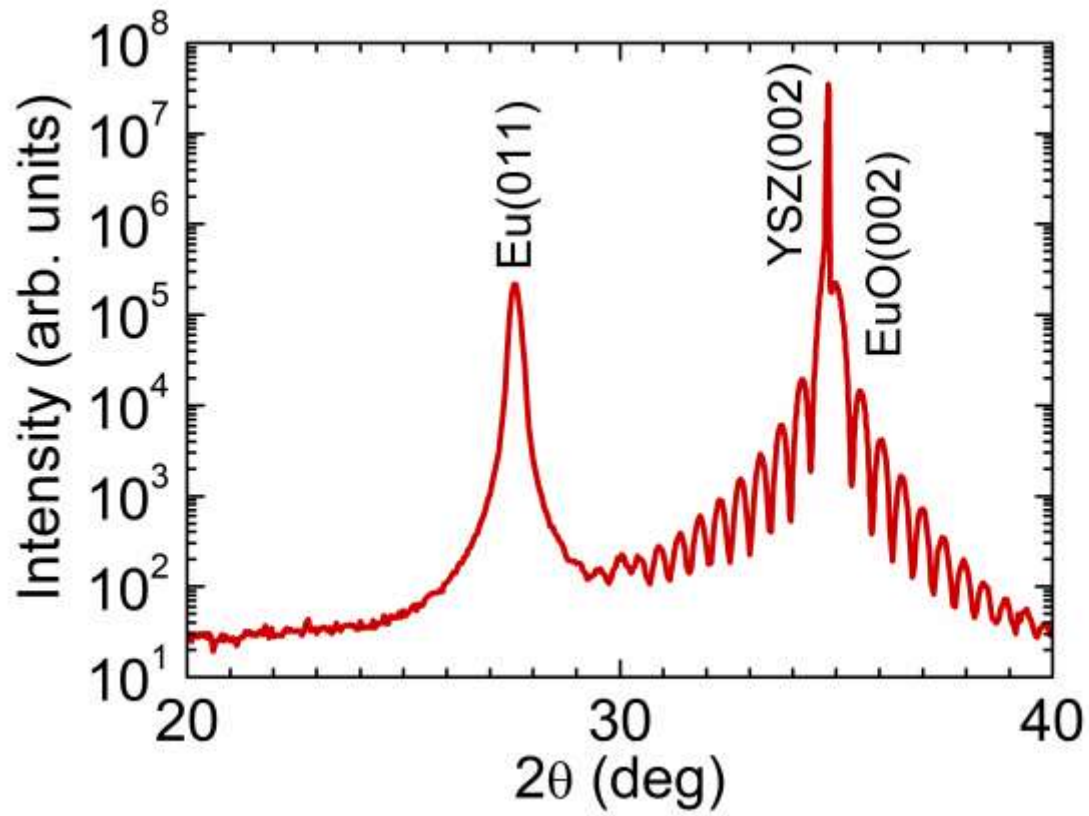

**Fig. S1.** A magnified region from  $20^\circ$  to  $40^\circ$  of the  $\theta$ - $2\theta$  XRD scan of the  $\text{SiO}_x/\text{Eu}(60\text{nm})/\text{EuO}/\text{YSZ}(001)$  film showing well-developed thickness fringes of the EuO layer.

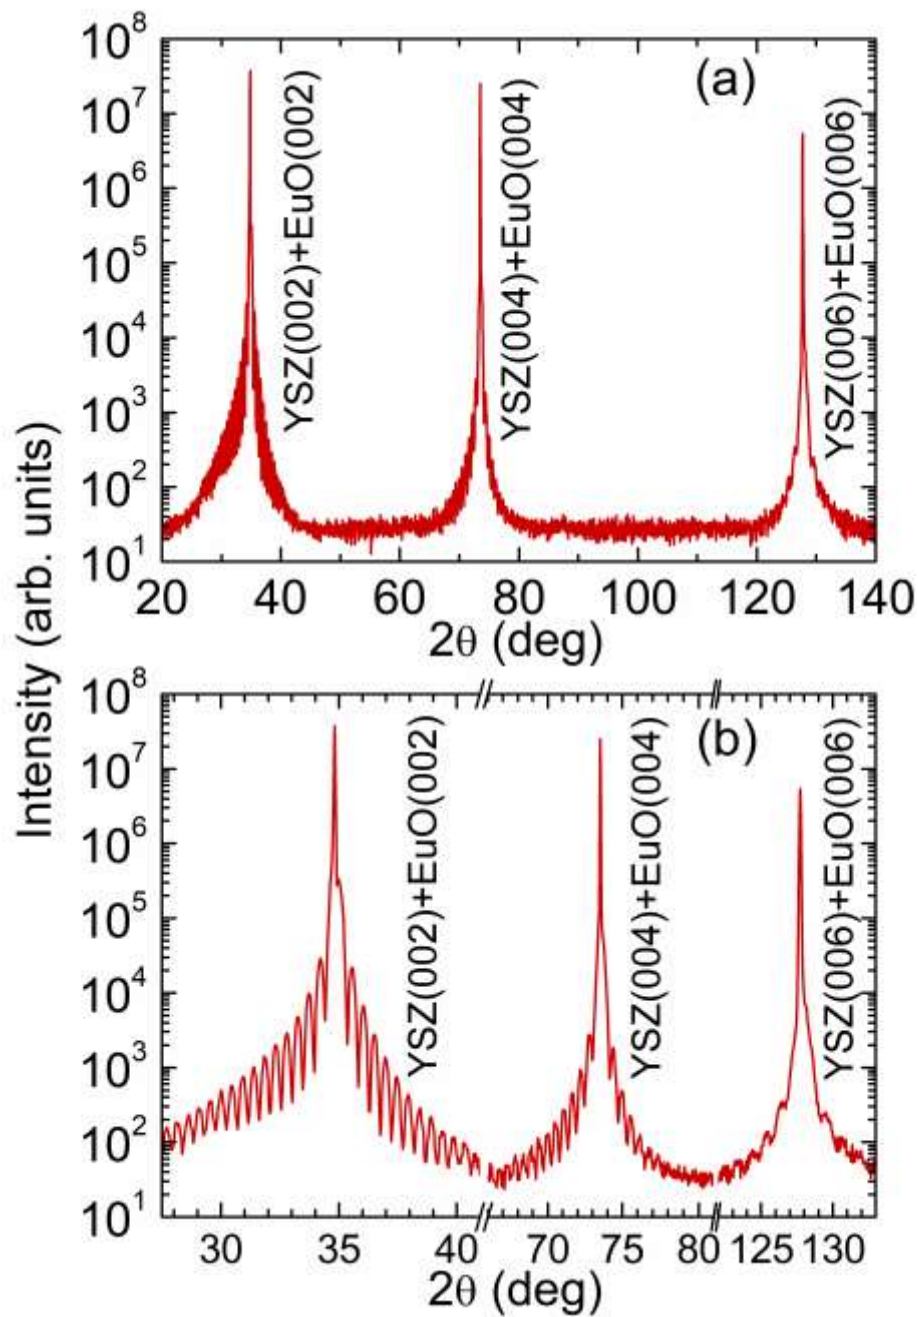

**Fig. S2.** (a)  $\theta$ - $2\theta$  XRD scan of the  $\text{SiO}_x/\text{EuO}/\text{YSZ}(001)$  film; (b) magnified images around peaks  $\text{EuO}(002)$ ,  $(004)$  and  $(006)$  showing thickness fringes.

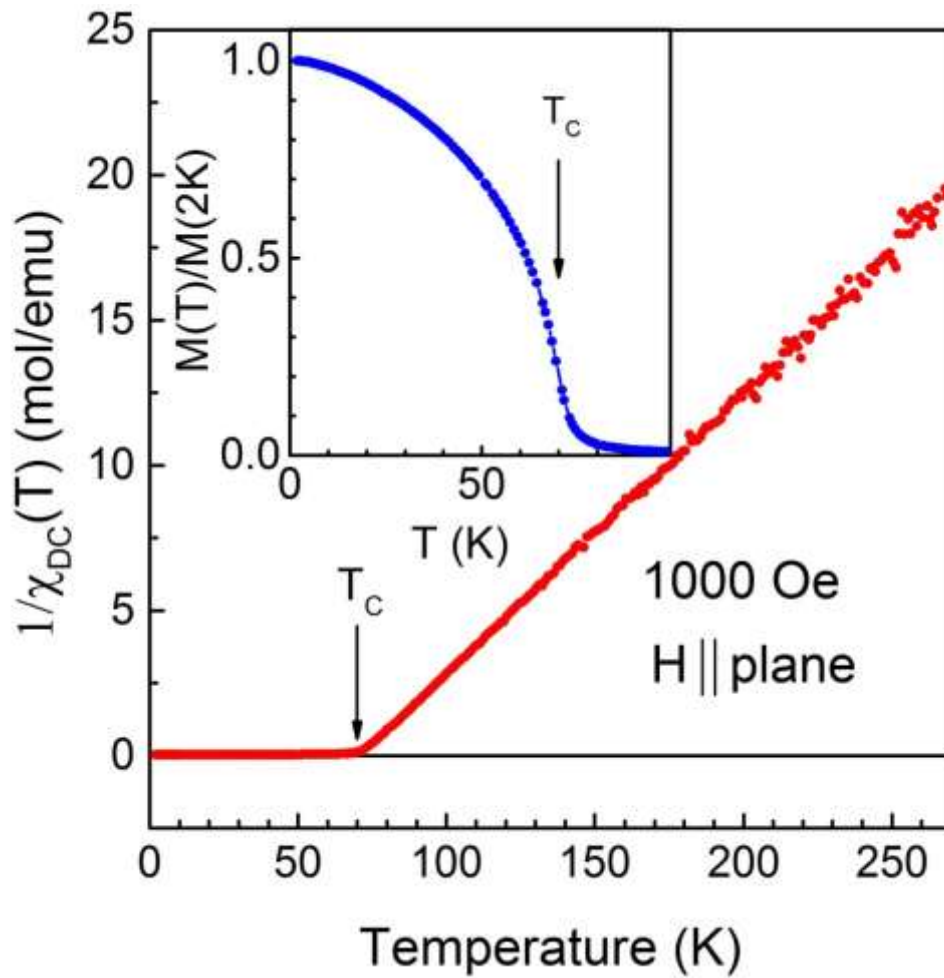

**Fig. S3.** Temperature dependence of the inverse of the DC susceptibility of the  $\text{SiO}_x/\text{EuO}/\text{YSZ}(001)$  film in an in-plane (along the  $[100]$  axis of YSZ) magnetic field of 1000 Oe allowing for determination of the Curie temperature of EuO ( $T_C \approx 70$  K). Inset: temperature dependence of the normalized magnetic moment of the same film.

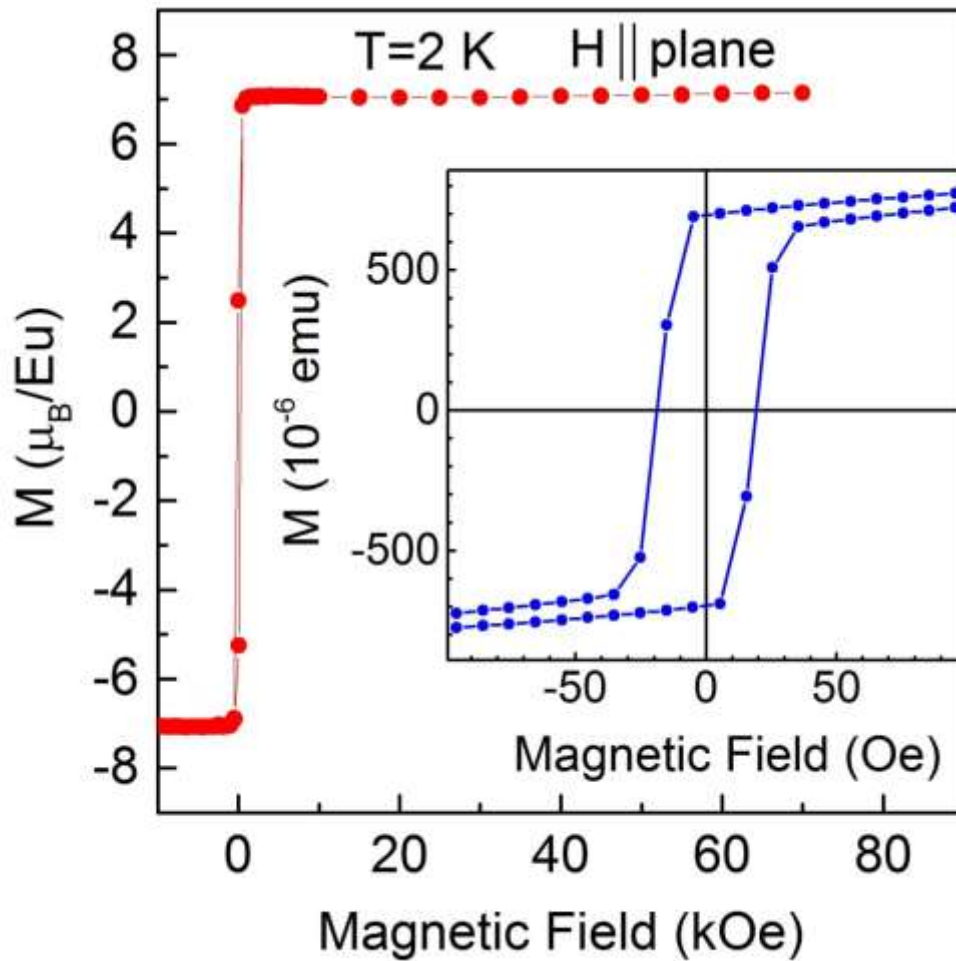

**Fig. S4.** Magnetic field dependence of the magnetic moment of the  $\text{SiO}_x/\text{EuO}/\text{YSZ}(001)$  film at 2 K. Inset: low-field part of the same dependence demonstrating that the hysteresis loop is centred at zero magnetic field. The magnetic field is directed along the  $[100]$  axis of YSZ.

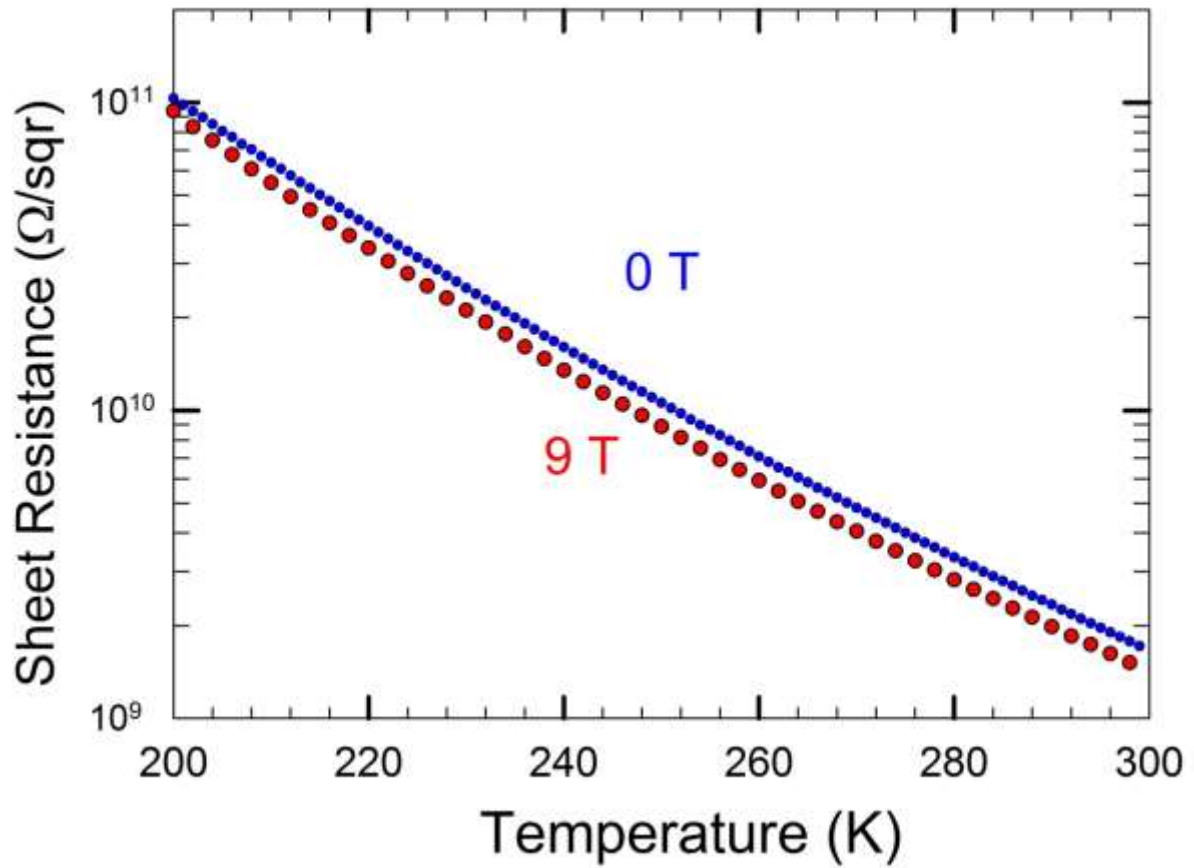

**Fig. S5.** Sheet resistance of the  $\text{SiO}_x/\text{EuO}/\text{YSZ}(001)$  film in zero magnetic field (blue) and in a magnetic field of 9 T normal to the surface of the film (red). At low temperature (below 200 K), the resistance is too high to be reliably measured.

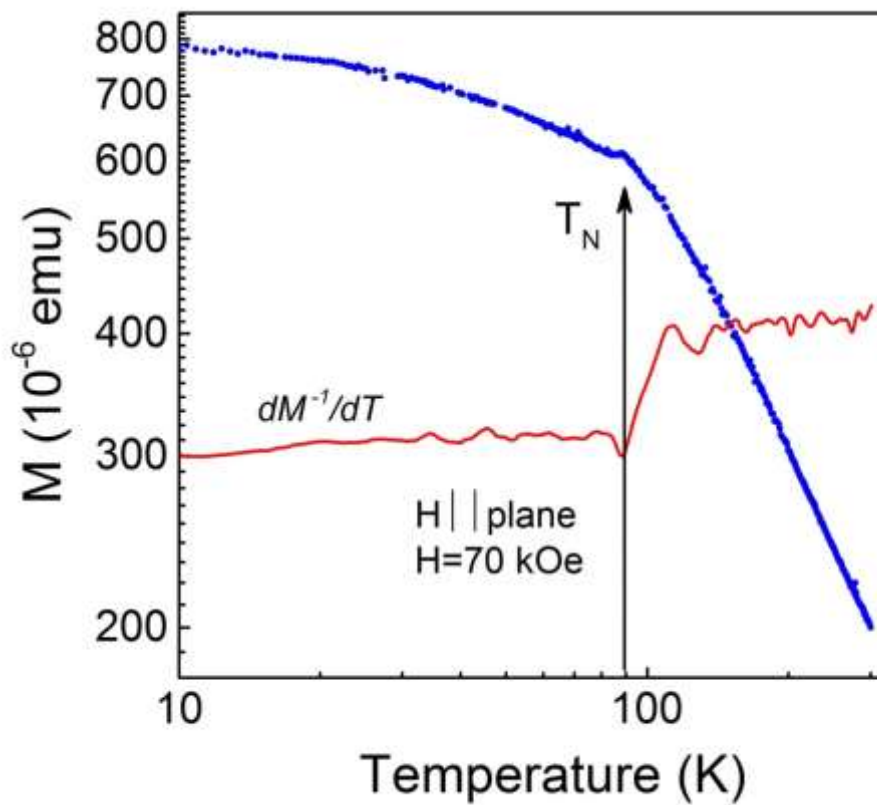

**Fig. S6.** Temperature dependence of the magnetic moment (blue) of the SiO<sub>x</sub>/Eu/YSZ(001) film in an in-plane (along the [100] axis of YSZ) magnetic field of 70 kOe demonstrating a feature at the Néel temperature of Eu ( $T_N \approx 90$  K). The red curve shows the temperature derivative  $dM^{-1}/dT$ .

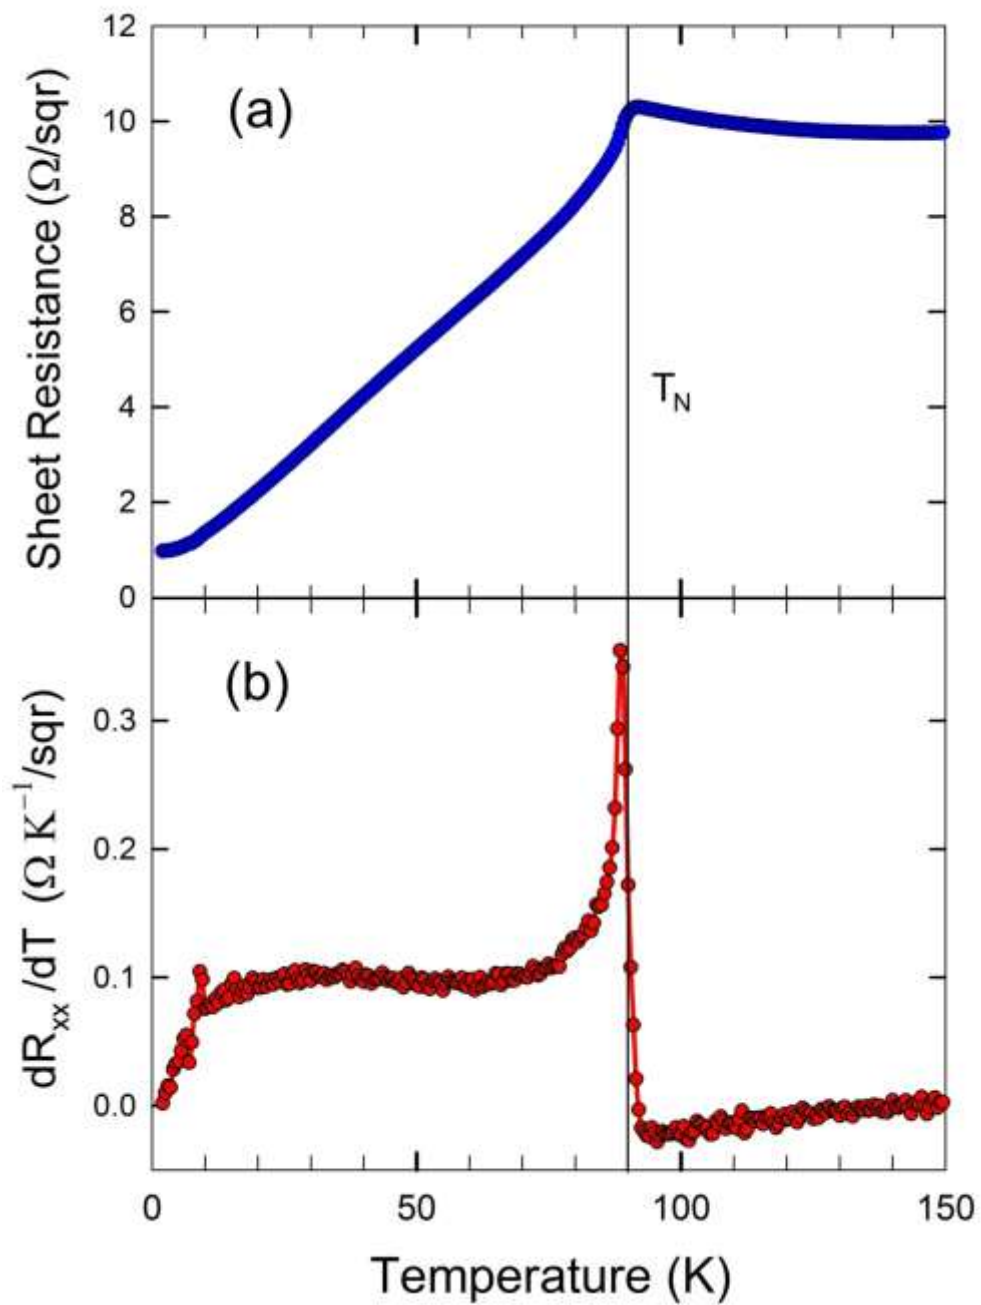

**Fig. S7.** (a) Temperature dependence of sheet resistance of the  $\text{SiO}_x/\text{Eu}/\text{YSZ}(001)$  film; (b) its temperature derivative. The vertical line indicates the Néel temperature of europium ( $T_N \approx 90$  K).



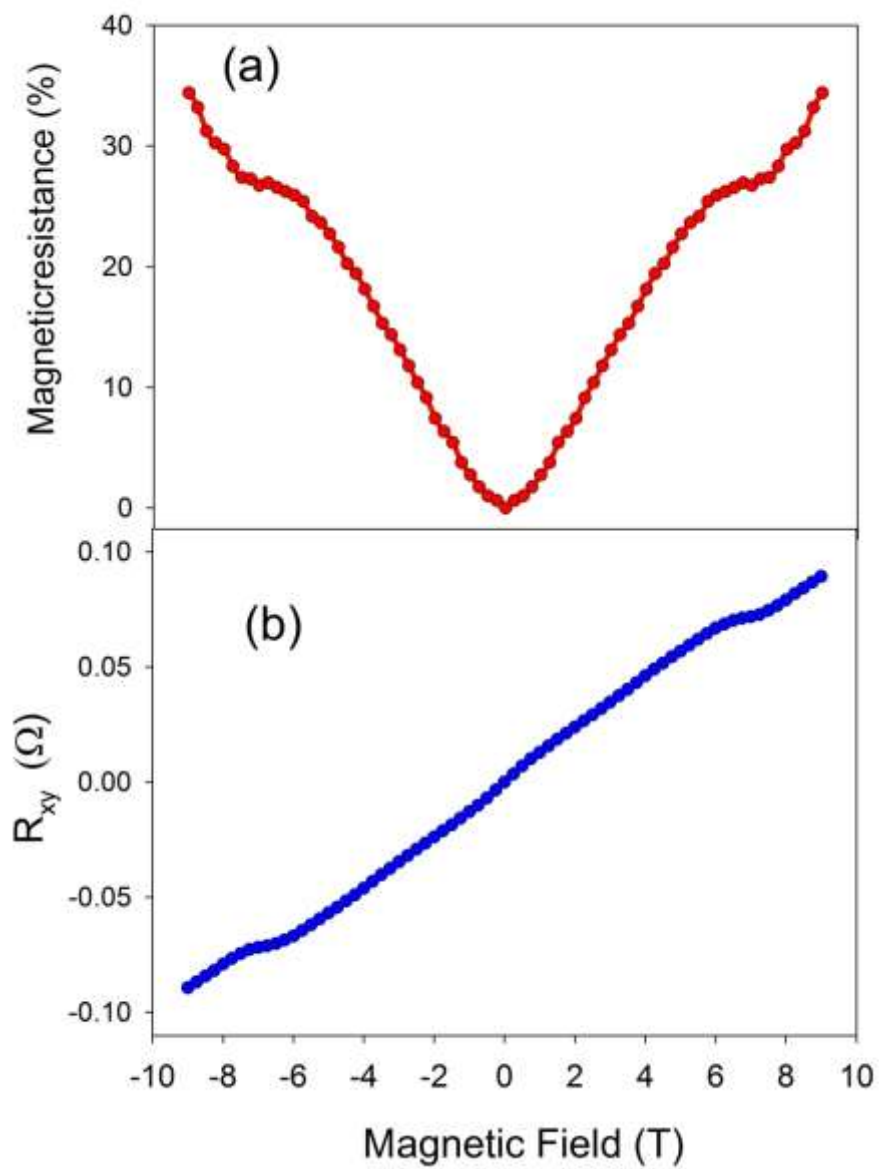

**Fig. S8.** Magnetic field dependence of (a) magnetoresistance (magnetic field is normal to the film surface) and (b) the Hall resistance of the SiO<sub>x</sub>/Eu/YSZ(001) film.
